# Supplementary material for: Mixed methods system for the assessment of post-exertional malaise in myalgic encephalomyelitis/chronic fatigue syndrome: an exploratory study
Source: PubMed Central journal article supplement — BMJ Neurol Open. 2024 Feb 10;6(1):e000529. doi: 10.1136/bmjno-2023-000529 (PMC10862339; doi:10.1136/bmjno-2023-000529), 2024-02-10
Supplement: bmjno-2023-000529supp001.pdf [file bmjno-2023-000529supp001.pdf]

### Appendix 1. Qualitative Interview questions asked at 6 time points before and following Cardiopulmonary Exercise Test.

- I am interested in how you feel **right now** *physically, cognitively and emotionally*. First, please describe how you are feeling *physically* **right now**.
  - How does this compare to [previous time point]?
- Now please describe your *cognitive* state **right now**. [*mental fatigue, memory, and how well you are thinking*]
  - How does this compare to [previous time point]?
- Now please describe your *emotional* state **right now**.
  - How does this compare to [previous time point]?
- [*if symptoms given*] What symptoms are bothering you the most **right now**? Please explain.
  - [*Ask about EVERY most bothersome symptom mentioned at ALL previous interviews and how they compare with last interview*]
- Please describe how your current state compares to how you typically feel on an average day (i.e. is compared to your usual baseline?) Please explain.
- Did [symptoms mentioned above] come on more suddenly or more gradually?
- How do you feel compared to [XX hours] after an activity or exertion in your day to day life? Please explain.
- Are any of the symptoms you feel now new symptoms that you have not had before?
- Anything else you would like to add to help us better understand how you are feeling right now?
